# Supplementary material for: UV-Casting on Methacrylated PCL for the Production of a Peripheral Nerve Implant Containing an Array of Porous Aligned Microchannels
Source: MDPI journal article supplement (doi:10.3390/polym12040971), 2020-04-22
Supplement: s1 [file s1]

Supplementary material:

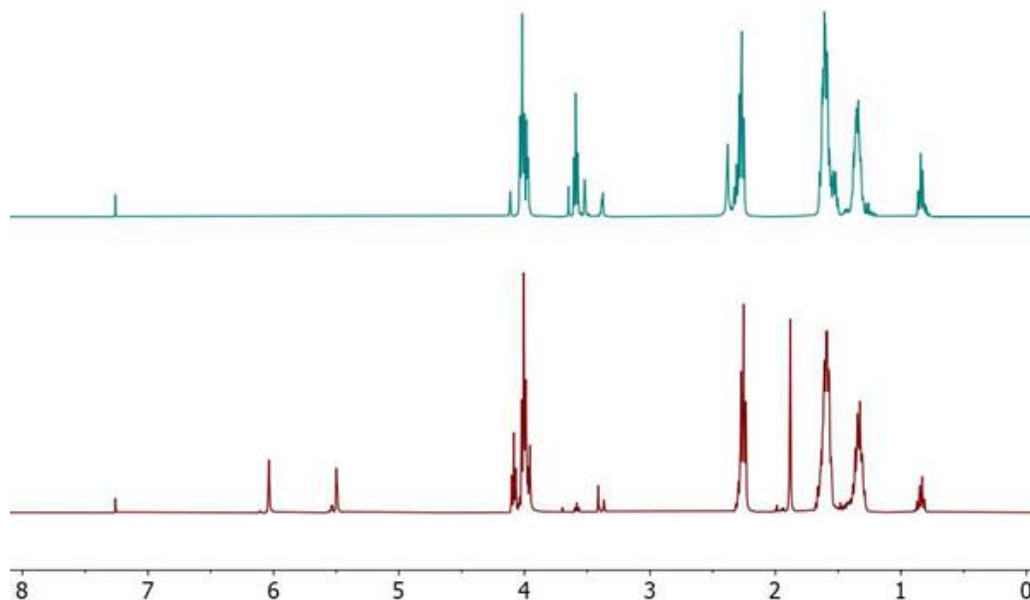

**Figure S1** NMR spectrum of PCL (top) and PCLm (bottom). All peaks are referenced to the diluent  $\text{CDCl}_3$

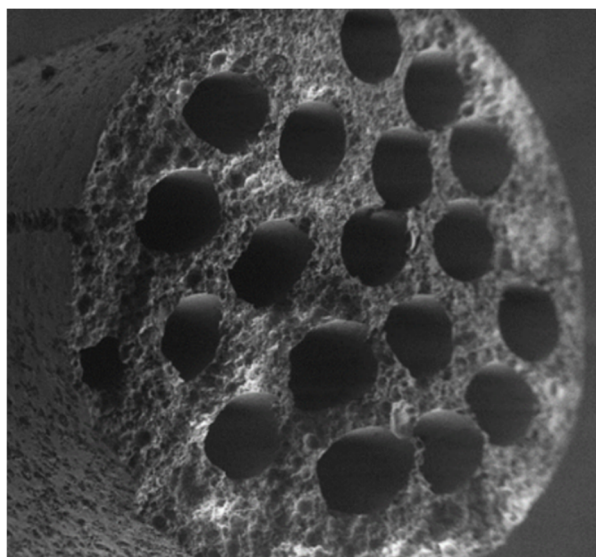

**Figure S2** SEM image of microchanneled PCLm porous tube showing the 200  $\mu\text{m}$  diameter channels and their arrangement over the tube section.

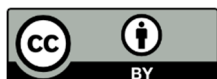

© 2019 by the authors. Submitted for possible open access publication under the terms and conditions of the Creative Commons Attribution (CC BY) license (<http://creativecommons.org/licenses/by/4.0/>).
